# Supplementary material for: Gastrointestinal Dysfunctions Are Associated withIL-10Variants in Parkinson’s Disease
Source: Hindawi journal article supplement (doi:10.1155/2018/5908359), 2018-12-05
Supplement: f1 [file 5908359.f1.pdf]

**Supplementary Table 1. Results of *IL-10* rs1800871 eQTLs from Braineac database.**

| geneSymbol             | marker         | rsid      | exprID  | chr  | start     | stop      | aveALL          | CRBL            | FCTX            | HIPP            | MEDU            | OCTX     | PUTM     | SNIG            | TCTX     | THAL            | WHMT            |
|------------------------|----------------|-----------|---------|------|-----------|-----------|-----------------|-----------------|-----------------|-----------------|-----------------|----------|----------|-----------------|----------|-----------------|-----------------|
| <i>IKBKE, C1orf147</i> | chr1:206946634 | rs1800871 | 2376833 | chr1 | 206643758 | 206671379 | 8.80E-01        | 6.20E-01        | 8.20E-01        | 7.00E-02        | 3.50E-01        | 3.60E-01 | 9.40E-01 | <b>2.20E-04</b> | 9.50E-01 | 5.20E-02        | 9.70E-01        |
| <i>C4BPA</i>           | chr1:206946634 | rs1800871 | 2377185 | chr1 | 207277590 | 207332055 | 4.60E-01        | <b>7.60E-04</b> | 9.30E-01        | 6.50E-01        | 4.70E-01        | 2.90E-01 | 3.10E-01 | 8.80E-01        | 9.30E-01 | 7.90E-01        | 4.30E-01        |
| <i>FAIM3</i>           | chr1:206946634 | rs1800871 | 2452987 | chr1 | 207076630 | 207101034 | <b>1.30E-02</b> | 3.20E-01        | 2.20E-01        | 3.00E-01        | 5.00E-02        | 5.60E-01 | 6.80E-01 | 3.10E-01        | 5.60E-01 | 5.40E-01        | <b>9.70E-04</b> |
| <i>LGTN</i>            | chr1:206946634 | rs1800871 | 2452902 | chr1 | 206744640 | 206785896 | 5.00E-01        | 7.50E-01        | 2.30E-01        | 6.70E-01        | 8.20E-01        | 4.00E-01 | 4.80E-01 | <b>1.20E-03</b> | 7.20E-01 | 9.50E-01        | <b>1.20E-02</b> |
| <i>PIGR</i>            | chr1:206946634 | rs1800871 | 2453011 | chr1 | 207101875 | 207119807 | 1.90E-01        | 8.30E-01        | 9.70E-01        | <b>2.20E-02</b> | 3.60E-01        | 5.40E-01 | 4.50E-01 | <b>1.50E-03</b> | 9.80E-01 | 4.80E-01        | <b>9.30E-03</b> |
| <i>CD46, CRIL</i>      | chr1:206946634 | rs1800871 | 2377507 | chr1 | 207818478 | 207983220 | 1.60E-01        | 7.70E-01        | 5.60E-01        | 2.60E-01        | 8.10E-01        | 2.30E-01 | 9.60E-02 | 1.90E-01        | 5.50E-01 | <b>1.70E-03</b> | 4.40E-01        |
| <i>PIGR</i>            | chr1:206946634 | rs1800871 | 2453018 | chr1 | 207101875 | 207119807 | 2.90E-01        | 9.20E-01        | 8.40E-01        | 3.60E-01        | <b>1.90E-03</b> | 2.10E-01 | 6.90E-02 | 2.80E-01        | 2.40E-01 | 7.60E-01        | 1.20E-01        |
| <i>IL20</i>            | chr1:206946634 | rs1800871 | 2377026 | chr1 | 207038709 | 207042565 | <b>4.00E-03</b> | 3.00E-01        | <b>2.60E-03</b> | 8.80E-02        | 5.80E-01        | 9.60E-02 | 1.90E-01 | 3.10E-01        | 5.60E-01 | 7.90E-01        | 8.80E-02        |
| <i>CR1, CRIL</i>       | chr1:206946634 | rs1800871 | 2377424 | chr1 | 207669246 | 207815110 | 3.60E-01        | 3.10E-01        | 1.30E-01        | 4.40E-01        | <b>2.70E-03</b> | 7.10E-01 | 2.70E-01 | <b>4.40E-02</b> | 2.40E-01 | 4.70E-01        | 8.60E-01        |
| <i>C4BPA</i>           | chr1:206946634 | rs1800871 | 2377169 | chr1 | 207277590 | 207332055 | 7.50E-01        | 2.70E-01        | 7.20E-01        | 3.40E-01        | 2.20E-01        | 6.70E-01 | 3.50E-01 | <b>3.30E-03</b> | 8.00E-02 | 4.00E-01        | 2.10E-01        |

Abbreviations: Ave All, average across all ten regions; CRBL, cerebellum; FCTX, frontal cortex; HIPP, hippocampus; MEDU, medulla; OCTX, occipital cortex; PUTM, putamen; SNIG, substantia nigra; TCTX, temporal cortex; THAL, thalamus; WHMT, white matter. The bold text represents statistically significant results.

**Supplementary Table 2. Results of *IL-10* rs1800872 eQTLs from Braineac database.**

| geneSymbol             | marker         | rsid      | exprID  | chr  | start     | stop      | aveALL          | CRBL            | FCTX            | HIPP            | MEDU            | OCTX     | PUTM            | SNIG            | TCTX     | THAL            | WHMT            |
|------------------------|----------------|-----------|---------|------|-----------|-----------|-----------------|-----------------|-----------------|-----------------|-----------------|----------|-----------------|-----------------|----------|-----------------|-----------------|
| <i>IKBKE, Clorf147</i> | chr1:206946407 | rs1800872 | 2376833 | chr1 | 206643758 | 206671379 | 8.00E-01        | 5.70E-01        | 7.90E-01        | 7.20E-02        | 3.90E-01        | 4.10E-01 | 9.90E-01        | <b>1.50E-04</b> | 9.00E-01 | 5.80E-02        | 9.30E-01        |
| <i>FAIM3</i>           | chr1:206946407 | rs1800872 | 2452987 | chr1 | 207076630 | 207101034 | <b>1.30E-02</b> | 3.60E-01        | 2.30E-01        | 2.60E-01        | 5.70E-02        | 5.60E-01 | 6.80E-01        | 2.70E-01        | 5.20E-01 | 5.50E-01        | <b>8.40E-04</b> |
| <i>LGTN</i>            | chr1:206946407 | rs1800872 | 2452902 | chr1 | 206744640 | 206785896 | 5.40E-01        | 7.80E-01        | 2.30E-01        | 6.50E-01        | 8.70E-01        | 4.50E-01 | 4.50E-01        | <b>1.20E-03</b> | 6.60E-01 | 9.90E-01        | <b>1.40E-02</b> |
| <i>C4BPA</i>           | chr1:206946407 | rs1800872 | 2377185 | chr1 | 207277590 | 207332055 | 4.40E-01        | <b>1.20E-03</b> | 9.50E-01        | 6.40E-01        | 4.60E-01        | 3.10E-01 | 3.30E-01        | 8.50E-01        | 9.10E-01 | 7.20E-01        | 4.20E-01        |
| <i>CD46, CRIL</i>      | chr1:206946407 | rs1800872 | 2377507 | chr1 | 207818478 | 207983220 | 1.50E-01        | 7.40E-01        | 5.70E-01        | 2.40E-01        | 8.00E-01        | 2.40E-01 | 7.50E-02        | 1.80E-01        | 5.10E-01 | <b>1.60E-03</b> | 4.30E-01        |
| <i>CR1, CRIL</i>       | chr1:206946407 | rs1800872 | 2377424 | chr1 | 207669246 | 207815110 | 3.00E-01        | 3.30E-01        | 1.30E-01        | 4.50E-01        | <b>2.20E-03</b> | 7.10E-01 | 2.30E-01        | 6.00E-02        | 2.30E-01 | 4.50E-01        | 8.30E-01        |
| <i>PIGR</i>            | chr1:206946407 | rs1800872 | 2453018 | chr1 | 207101875 | 207119807 | 2.90E-01        | 9.70E-01        | 8.90E-01        | 3.50E-01        | <b>2.20E-03</b> | 2.40E-01 | 7.90E-02        | 2.50E-01        | 2.40E-01 | 6.90E-01        | 1.40E-01        |
| <i>PIGR</i>            | chr1:206946407 | rs1800872 | 2453011 | chr1 | 207101875 | 207119807 | 1.80E-01        | 8.80E-01        | 9.80E-01        | <b>2.50E-02</b> | 3.60E-01        | 6.00E-01 | 4.80E-01        | <b>2.50E-03</b> | 9.60E-01 | 4.60E-01        | <b>7.00E-03</b> |
| <i>IL20</i>            | chr1:206946407 | rs1800872 | 2377026 | chr1 | 207038709 | 207042565 | <b>4.20E-03</b> | 3.20E-01        | <b>2.80E-03</b> | 8.70E-02        | 6.00E-01        | 1.10E-01 | 1.80E-01        | 3.00E-01        | 5.00E-01 | 7.20E-01        | 1.00E-01        |
| <i>IL10</i>            | chr1:206946407 | rs1800872 | 2452956 | chr1 | 206940955 | 206958002 | 2.50E-01        | <b>3.50E-03</b> | <b>4.00E-02</b> | 6.20E-01        | 2.20E-01        | 5.80E-01 | <b>4.00E-02</b> | 9.30E-01        | 4.00E-01 | 9.10E-01        | 6.00E-01        |

Abbreviations: Ave All, average across all ten regions; CRBL, cerebellum; FCTX, frontal cortex; HIPP, hippocampus; MEDU, medulla; OCTX, occipital cortex; PUTM, putamen; SNIG, substantia nigra; TCTX, temporal cortex; THAL, thalamus; WHMT, white matter. The bold text represents statistically significant results.
